# Supplementary material for: Comparing human and chimpanzee temporal lobe neuroanatomy reveals modifications to human language hubs beyond the frontotemporal arcuate fasciculus
Source: PubMed Central journal article supplement — Proc Natl Acad Sci U S A. 2022 Jul 5;119(28):e2118295119. doi: 10.1073/pnas.2118295119 (PMC9282369; doi:10.1073/pnas.2118295119), 2022-07-05
Supplement: pnas.2118295119.sapp.pdf [file pnas.2118295119.sapp.pdf]

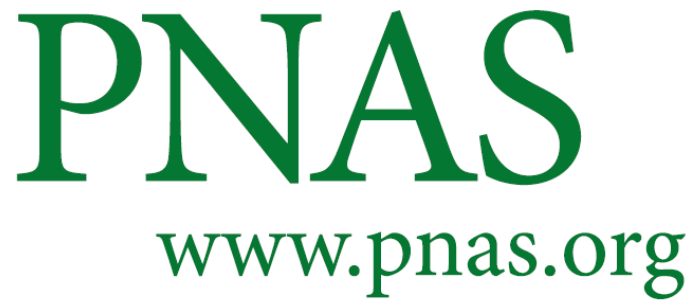

### **Supplementary Information for**

Comparing human and chimpanzee temporal lobe neuroanatomy reveals modifications to human language hubs beyond the fronto-temporal arcuate fascicle

Joanna Sierpowska<sup>†</sup>, Katherine L. Bryant<sup>†</sup>, Nikki Janssen, Guilherme Blazquez Freches, Manon Römken, Margot Mangnus, Rogier B. Mars, Vitoria Piai

<sup>†</sup> Equal contribution

Joanna Sierpowska

Email: [joanna.sierpowska@donders.ru.nl](mailto:joanna.sierpowska@donders.ru.nl)

#### **This PDF file includes:**

Figures S1 to S4  
Tables S1 to S3

**Fig. S1.** Overlap of probabilistic tractography results (tractograms) of humans (upper) and chimpanzees (lower) and right-hemispheric seeds (pMTG and ATL) from 10% (purple) to 100% (red) of the subjects. Results for the left hemisphere are reported in the main manuscript (see Fig 1). Brains are not to scale.

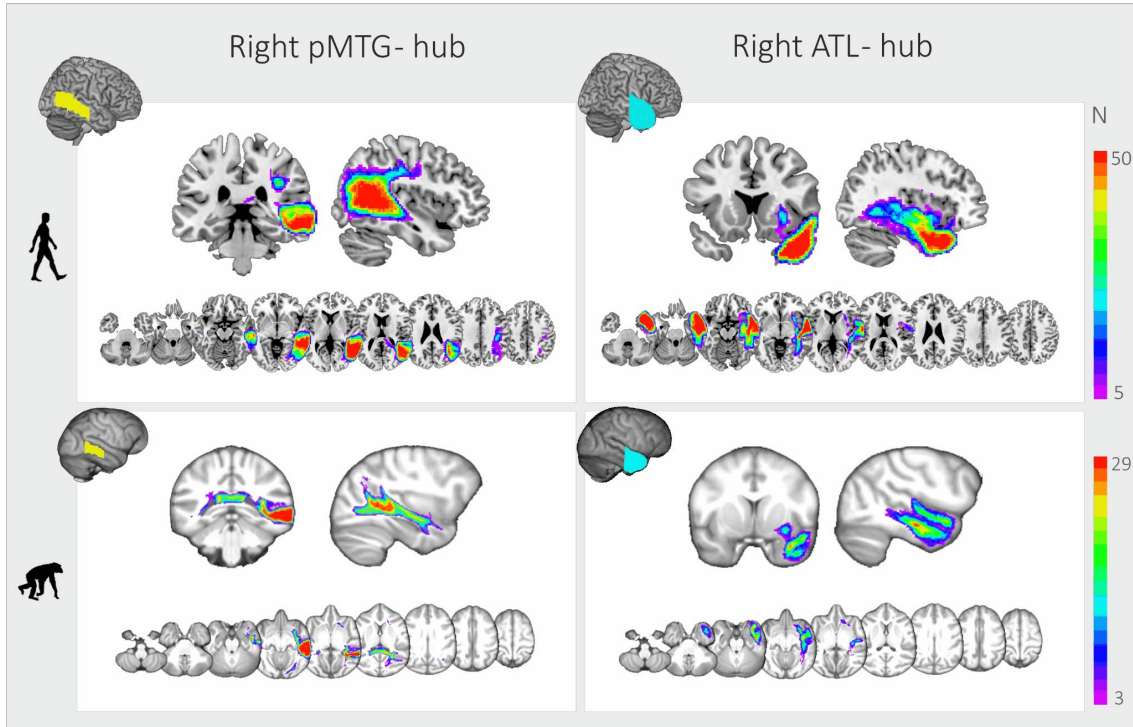

**Fig. S2.** Mean of the normalized, thresholded tractograms of the three subdivisions of the arcuate fasciculus (AF): fronto-parietal (a), parieto-temporal (b), and fronto-temporal (c) in humans and chimpanzees. Brains are not to scale. L = left; R = right.

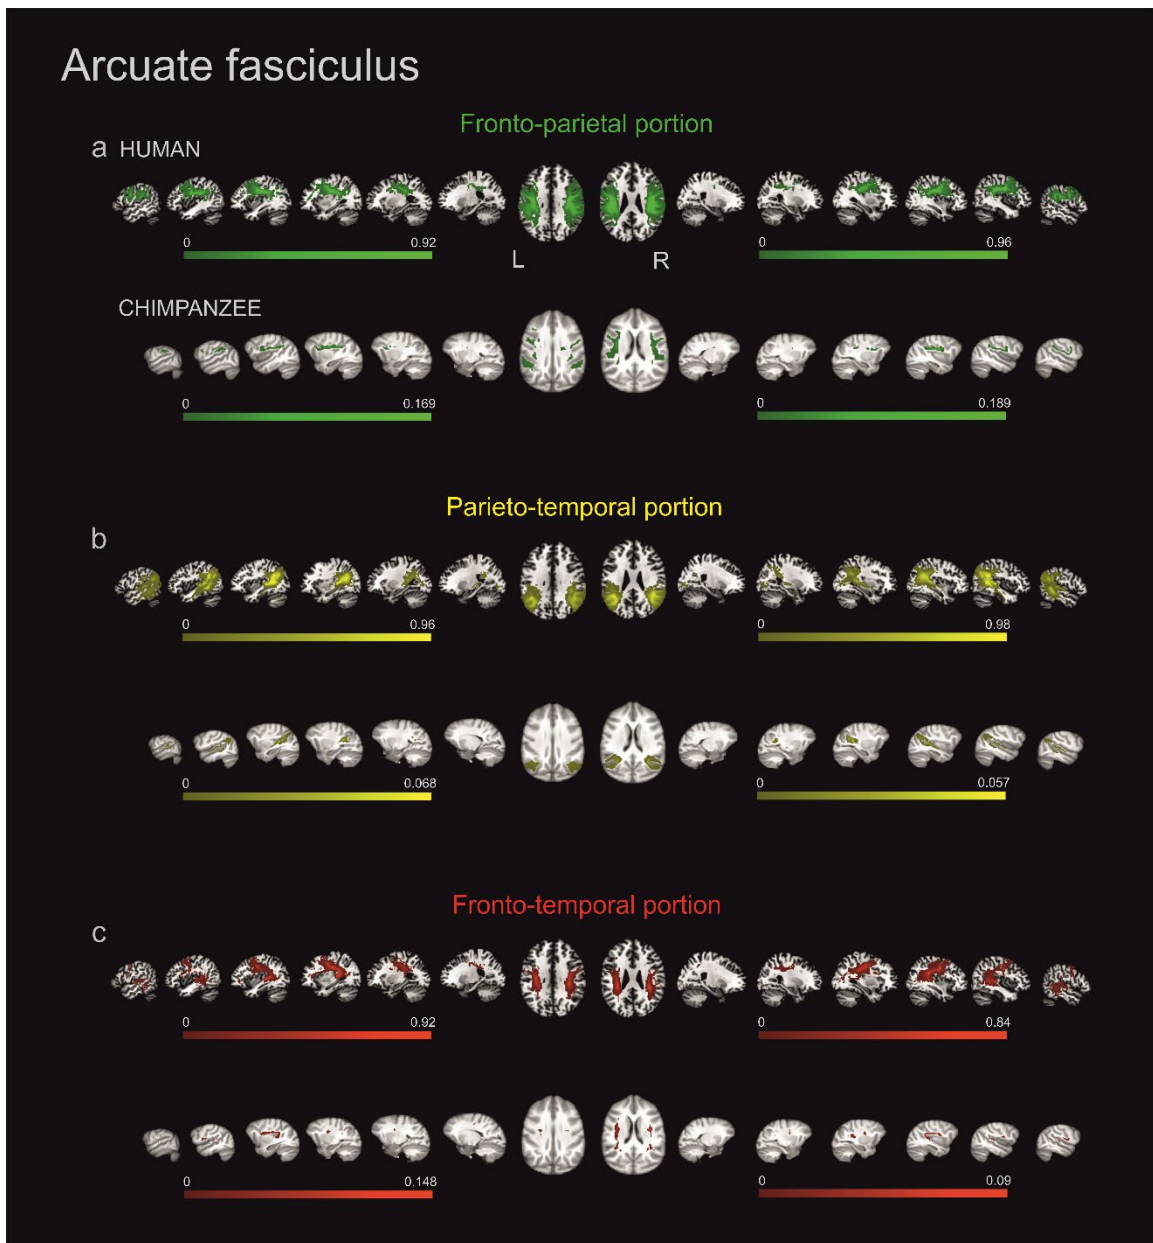

**Fig. S3.** The three versions of possible anatomical limits of the chimpanzee pMTG masks. A) a mask stopping at the posterior edge of the Sylvian fissure (green), B) a mask expanded to reach the descending ramus of the STS (yellow) and further selected as the best candidate for further analyses, and C) a mask created based on the atlas proposed by Vickery and colleagues (2020), (blue).

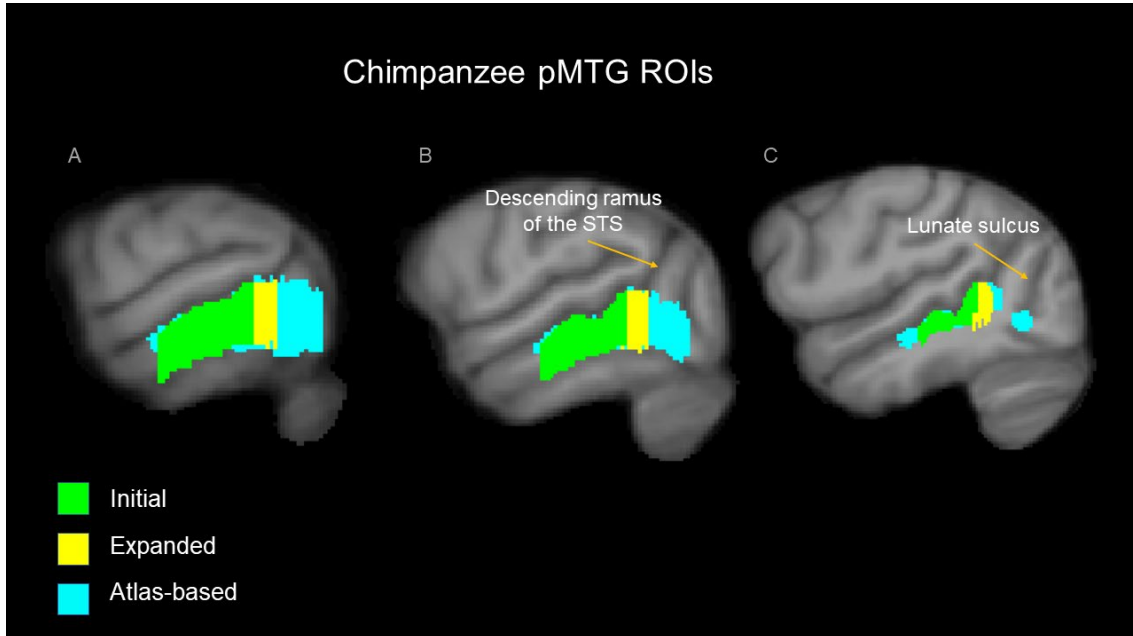

**Fig. S4.** Representation of three anatomical proposals of pMTG regions of interest (ROI) delineation with tractograms corresponding to each ROIs. a) posterior limit at the end of the Sylvian fissure; b) posterior limit of the ROI reaching the descending ramus of the superior temporal sulcus (STS) and c) reproduced after the chimpanzee brain parcellation atlas by Vickery et al. (2020).

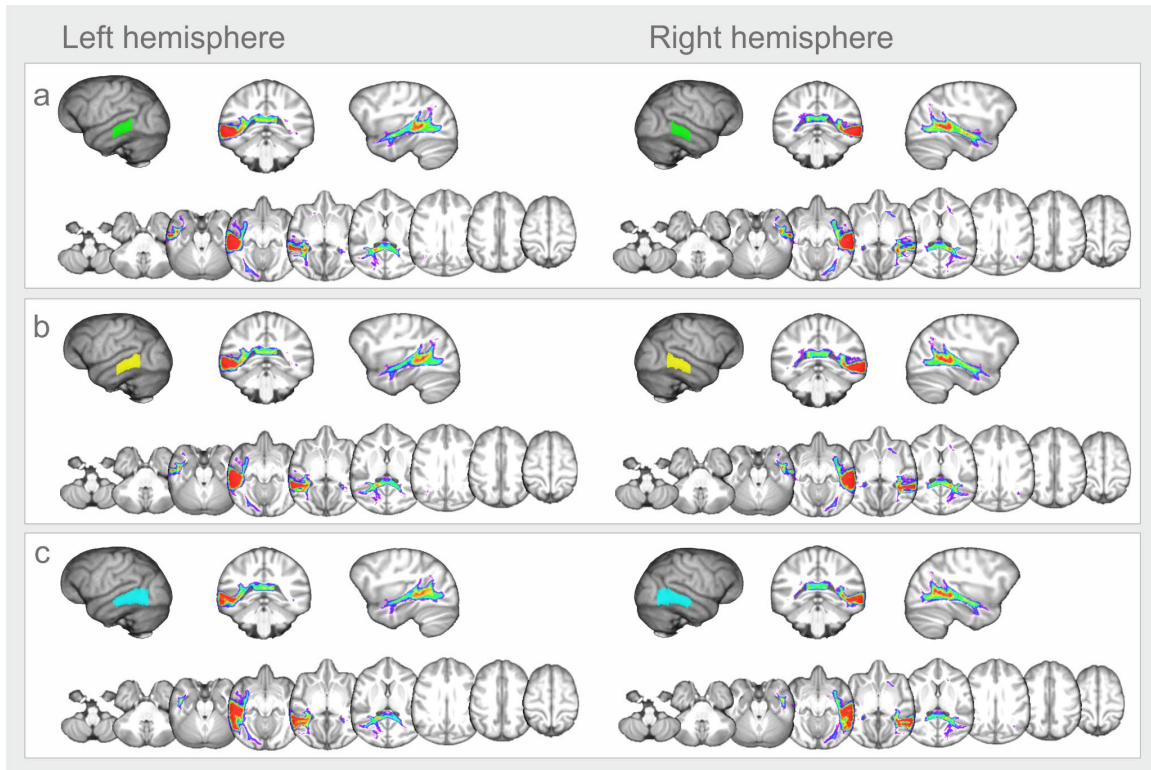

**Table S1.** Results of the repeated measures ANOVA for the effects of species, hemisphere, stream, and their interactions, for the posterior middle temporal gyrus seed.

|                                        | <b>df</b> | <b>F value</b> | <b>p value</b> |
|----------------------------------------|-----------|----------------|----------------|
| <b>Species</b>                         | 1,77      | 9.065          | .004           |
| <b>Hemisphere</b>                      | 1,77      | 11.5           | .001           |
| <b>Hemisphere by Species</b>           | 1,77      | < 1            | .993           |
| <b>Stream</b>                          | 1,77      | 35.73          | <.001          |
| <b>Stream by Species</b>               | 1,77      | 454.9          | <.001          |
| <b>Hemisphere by Stream</b>            | 1,77      | 16.93          | <.001          |
| <b>Hemisphere by Stream by Species</b> | 1,77      | 22.81          | <.001          |

**Table S2.** Results of the repeated measures ANOVA for the effects of species, hemisphere, stream, and their interactions, for the anterior temporal lobe seed.

|                                        | <b>df</b> | <b>F value</b> | <b>p value</b> |
|----------------------------------------|-----------|----------------|----------------|
| <b>Species</b>                         | 1,77      | 137.7          | <.001          |
| <b>Hemisphere</b>                      | 1,77      | 19.74          | <.001          |
| <b>Hemisphere by Species</b>           | 1,77      | 5.201          | 0.025          |
| <b>Stream</b>                          | 1,77      | 4593           | <.001          |
| <b>Stream by Species</b>               | 1,77      | 351.5          | <.001          |
| <b>Hemisphere by Stream</b>            | 1,77      | 7.255          | <.001          |
| <b>Hemisphere by Stream by Species</b> | 1,77      | 15.42          | <.001          |

**Table S3.** Results of the repeated measures ANOVAs for the effects of species, stream, and their interaction, per seed and hemisphere. hem = hemisphere; L = left; R = right; ATL = anterior temporal lobe; pMTG = posterior middle temporal gyrus.

| hem | seed | term              | df   | F value  | p value |
|-----|------|-------------------|------|----------|---------|
| L   | ATL  | species           | 1,77 | 117.707  | < .001  |
| L   | ATL  | stream            | 1,77 | 2886.808 | < .001  |
| L   | ATL  | stream by species | 1,77 | 287.454  | < .001  |
| L   | pMTG | species           | 1,77 | 6.463    | .013    |
| L   | pMTG | stream            | 1,77 | 2.959    | .089    |
| L   | pMTG | stream by species | 1,77 | 190.4    | < .001  |
| R   | ATL  | species           | 1,77 | 97.689   | < .001  |
| R   | ATL  | stream            | 1,77 | 2421.978 | < .001  |
| R   | ATL  | stream by species | 1,77 | 133.684  | < .001  |



---

|          |      |         |      |      |      |
|----------|------|---------|------|------|------|
| <b>R</b> | pMTG | species | 1,77 | 8.73 | .004 |
|----------|------|---------|------|------|------|

---

|          |      |        |      |      |        |
|----------|------|--------|------|------|--------|
| <b>R</b> | pMTG | stream | 1,77 | 42.4 | < .001 |
|----------|------|--------|------|------|--------|

---

|          |      |                   |      |       |        |
|----------|------|-------------------|------|-------|--------|
| <b>R</b> | pMTG | stream by species | 1,77 | 291.2 | < .001 |
|----------|------|-------------------|------|-------|--------|

---
